# Supplementary material for: Anamnestic Immune Response and Safety of an Inactivated Quadrivalent Influenza Vaccine in Primed Versus Vaccine-Naïve Children
Source: PubMed Central journal article supplement — Pediatr Infect Dis J. 2018 Oct 15;38(2):203–10. doi: 10.1097/INF.0000000000002217 (PMC6344072; doi:10.1097/inf.0000000000002217), 2018-10-15
Supplement: inf-38-203-s001.pdf [file inf-38-203-s001.pdf]

## Supplemental Digital Content 1

### Control vaccine schedule used in the primary study

| Vaccine                                          | Schedule                                                                               |
|--------------------------------------------------|----------------------------------------------------------------------------------------|
| Vaccine-primed children $\geq 12$ months         | 1 dose of hepatitis A vaccine at Day 0                                                 |
| Unprimed children $\geq 12$ months               | 1 dose of hepatitis A vaccine at Day 0 and 1 dose of varicella virus vaccine at Day 28 |
| Children $< 12$ months (all considered unprimed) | 2 doses of pneumococcal vaccine at Days 0 and 28                                       |

Vaccine-primed or unprimed refers to priming for the influenza vaccine

Hepatitis A vaccine: *Havrix* (GSK); Pneumococcal vaccine: *Prevenar13* (Pfizer);

Varicella virus vaccine: *Varilrix* (GSK)

*Havrix* and *Varilrix* are trademarks of the GSK group of companies. *Prevenar13* is a trademark of Pfizer.
