# Supplementary material for: Anamnestic Immune Response and Safety of an Inactivated Quadrivalent Influenza Vaccine in Primed Versus Vaccine-Naïve Children
Source: PubMed Central journal article supplement — Pediatr Infect Dis J. 2018 Oct 15;38(2):203–10. doi: 10.1097/INF.0000000000002217 (PMC6344072; doi:10.1097/inf.0000000000002217), 2018-10-15
Supplement: inf-38-203-s003.pdf [file inf-38-203-s003.pdf]

## Supplemental Digital Content 3

**Difference in seroprotection rates for HI antibodies between primed and unprimed children, 7 days after first vaccination in the revaccination study (per-protocol cohort)**

|                   | <b>Difference in SPR, % (95% CI)<sup>1</sup></b> |
|-------------------|--------------------------------------------------|
| <b>A/H1N1</b>     | 62.43 (55.27-68.89)                              |
| <b>A/H3N2</b>     | 47.40 (39.08-55.06)                              |
| <b>B/Victoria</b> | 56.68 (49.44-63.43)                              |
| <b>B/Yamagata</b> | 56.72 (49.41-63.49)                              |

<sup>1</sup>Difference in SPR (primed minus unprimed), %

CI: confidence interval; SPR: seroprotection rate
