# Supplementary material for: Anamnestic Immune Response and Safety of an Inactivated Quadrivalent Influenza Vaccine in Primed Versus Vaccine-Naïve Children
Source: PubMed Central journal article supplement — Pediatr Infect Dis J. 2018 Oct 15;38(2):203–10. doi: 10.1097/INF.0000000000002217 (PMC6344072; doi:10.1097/inf.0000000000002217), 2018-10-15
Supplement: inf-38-203-s004.pdf [file inf-38-203-s004.pdf]

## Supplemental Digital Content 4

Seropositivity rate for HI antibodies pre-vaccination and 7 days after first vaccination in the revaccination study, by age strata (per-protocol cohort)

|                     | Primed |     |                                 | Unprimed |     |                                 |
|---------------------|--------|-----|---------------------------------|----------|-----|---------------------------------|
|                     | N      | n   | Seropositivity rate, % (95% CI) | N        | n   | Seropositivity rate, % (95% CI) |
| <b>17-29 months</b> |        |     |                                 |          |     |                                 |
| A/H1N1              |        |     |                                 |          |     |                                 |
| Pre-vaccination     | 91     | 73  | 80.2 (70.6-87.8)                | 89       | 17  | 19.1 (11.5-28.8)                |
| Post-vaccination    | 91     | 88  | 96.7 (90.7-99.3)                | 92       | 55  | 59.8 (49.0-69.9)                |
| A/H3N2              |        |     |                                 |          |     |                                 |
| Pre-vaccination     | 91     | 48  | 52.7 (42.0-63.3)                | 89       | 31  | 34.8 (25.0-45.7)                |
| Post-vaccination    | 91     | 87  | 95.6 (89.1-98.8)                | 92       | 38  | 41.3 (31.1-52.1)                |
| B/Victoria          |        |     |                                 |          |     |                                 |
| Pre-vaccination     | 91     | 71  | 78.0 (68.1-86.0)                | 89       | 20  | 22.5 (14.3-32.6)                |
| Post-vaccination    | 91     | 91  | 100 (96.0-100)                  | 92       | 68  | 73.9 (63.7-82.5)                |
| B/Yamagata          |        |     |                                 |          |     |                                 |
| Pre-vaccination     | 91     | 41  | 45.1 (34.6-55.8)                | 89       | 9   | 10.1 (4.7-18.3)                 |
| Post-vaccination    | 91     | 89  | 97.8 (92.3-99.7)                | 92       | 59  | 64.1 (53.5-73.9)                |
| <b>30-48 months</b> |        |     |                                 |          |     |                                 |
| A/H1N1              |        |     |                                 |          |     |                                 |
| Pre-vaccination     | 130    | 116 | 89.2 (82.6-94.0)                | 113      | 47  | 41.6 (32.4-51.2)                |
| Post-vaccination    | 133    | 132 | 99.2 (95.9-100)                 | 117      | 82  | 70.1 (60.9-78.2)                |
| A/H3N2              |        |     |                                 |          |     |                                 |
| Pre-vaccination     | 130    | 83  | 63.8 (55.0-72.1)                | 113      | 48  | 42.5 (33.2-52.1)                |
| Post-vaccination    | 133    | 131 | 98.5 (94.7-99.8)                | 117      | 61  | 52.1 (42.7-61.5)                |
| B/Victoria          |        |     |                                 |          |     |                                 |
| Pre-vaccination     | 130    | 116 | 89.2 (82.6-94.0)                | 113      | 38  | 33.6 (25.0-43.1)                |
| Post-vaccination    | 133    | 133 | 100 (97.3-100)                  | 117      | 106 | 90.6 (83.8-95.2)                |
| B/Yamagata          |        |     |                                 |          |     |                                 |
| Pre-vaccination     | 130    | 93  | 71.5 (63.0-79.1)                | 113      | 27  | 23.9 (16.4-32.8)                |
| Post-vaccination    | 133    | 133 | 100 (97.3-100)                  | 117      | 85  | 72.6 (63.6-80.5)                |

CI: confidence interval; HI: hemagglutination inhibition
