# Supplementary material for: Anamnestic Immune Response and Safety of an Inactivated Quadrivalent Influenza Vaccine in Primed Versus Vaccine-Naïve Children
Source: PubMed Central journal article supplement — Pediatr Infect Dis J. 2018 Oct 15;38(2):203–10. doi: 10.1097/INF.0000000000002217 (PMC6344072; doi:10.1097/inf.0000000000002217), 2018-10-15
Supplement: inf-38-203-s005.pdf [file inf-38-203-s005.pdf]

## Supplemental Digital Content 5

**GMT for HI antibodies pre-vaccination and 7 days after first vaccination in the revaccination study in children 17–29 months of age (per-protocol cohort)**

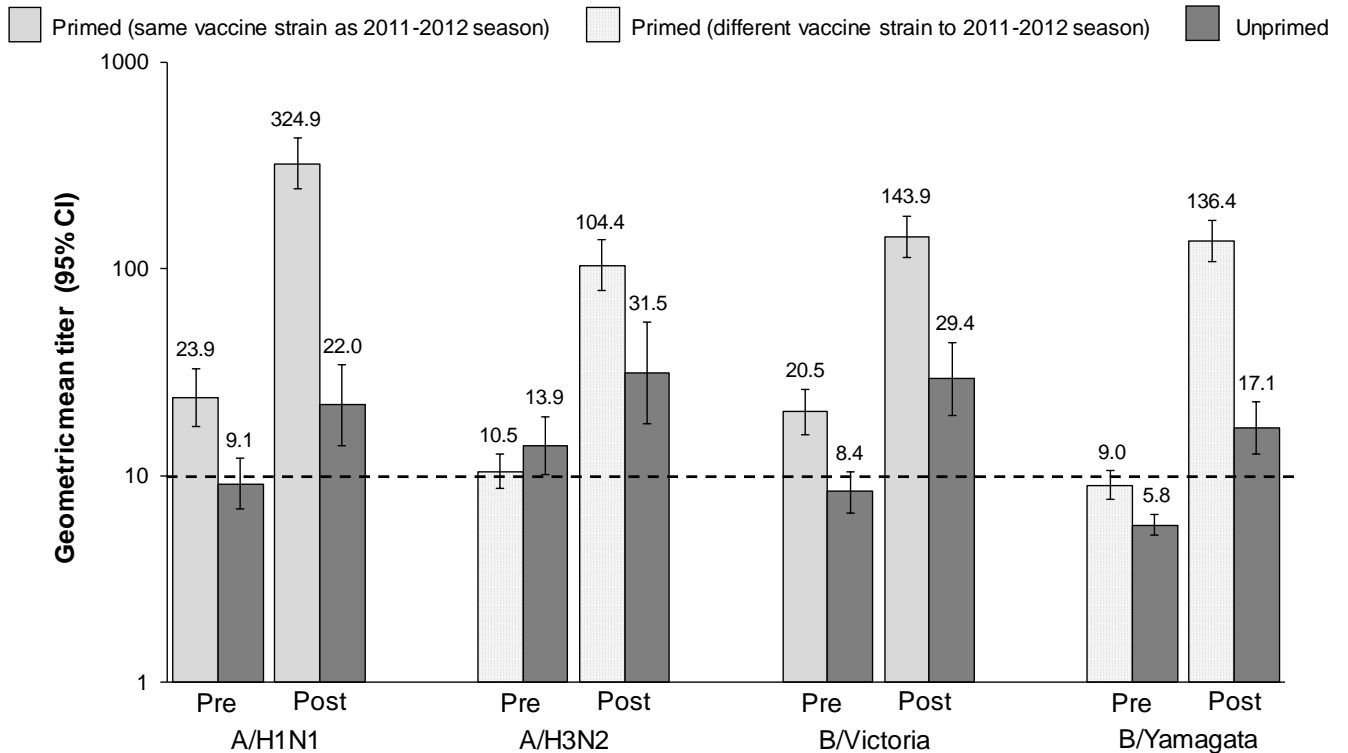

Dotted line represents the assay cut-off (10 1/dil). GMT values are shown above the bars.

CI: confidence interval; GMT: geometric mean titer; HI: hemagglutination inhibition; Pre: pre-vaccination; Post: 7 days following vaccination
