# Supplementary material for: Anamnestic Immune Response and Safety of an Inactivated Quadrivalent Influenza Vaccine in Primed Versus Vaccine-Naïve Children
Source: PubMed Central journal article supplement — Pediatr Infect Dis J. 2018 Oct 15;38(2):203–10. doi: 10.1097/INF.0000000000002217 (PMC6344072; doi:10.1097/inf.0000000000002217), 2018-10-15
Supplement: inf-38-203-s007.pdf [file inf-38-203-s007.pdf]

## Supplemental Digital Content 7

Seroconversion rate for HI antibodies 7 days after first vaccination in the revaccination study, overall and by age strata (per-protocol cohort)

|                     | Primed |     |                  | Unprimed |    |                  |
|---------------------|--------|-----|------------------|----------|----|------------------|
|                     | N      | n   | SCR, % (95% CI)  | N        | n  | SCR, % (95% CI)  |
| <b>All ages</b>     |        |     |                  |          |    |                  |
| A/H1N1              | 221    | 170 | 76.9 (70.8-82.3) | 202      | 65 | 32.2 (25.8-39.1) |
| A/H3N2              | 221    | 180 | 81.4 (75.7-86.3) | 202      | 73 | 36.1 (29.5-43.2) |
| B/Victoria          | 221    | 169 | 76.5 (70.3-81.9) | 202      | 78 | 38.6 (31.9-45.7) |
| B/Yamagata          | 221    | 208 | 94.1 (90.2-96.8) | 202      | 77 | 38.1 (31.4-45.2) |
| <b>17-29 months</b> |        |     |                  |          |    |                  |
| A/H1N1              | 91     | 77  | 84.6 (75.5-91.3) | 89       | 19 | 21.3 (13.4-31.3) |
| A/H3N2              | 91     | 72  | 79.1 (69.3-86.9) | 89       | 24 | 27.0 (18.1-37.4) |
| B/Victoria          | 91     | 72  | 79.1 (69.3-86.9) | 89       | 27 | 30.3 (21.0-41.0) |
| B/Yamagata          | 91     | 84  | 92.3 (84.8-96.9) | 89       | 25 | 28.1 (19.1-38.6) |
| <b>30-48 months</b> |        |     |                  |          |    |                  |
| A/H1N1              | 130    | 93  | 71.5 (63.0-79.1) | 113      | 46 | 40.7 (31.6-50.4) |
| A/H3N2              | 130    | 108 | 83.1 (75.5-89.1) | 113      | 49 | 43.4 (34.1-53.0) |
| B/Victoria          | 130    | 97  | 74.6 (66.2-81.8) | 113      | 51 | 45.1 (35.8-54.8) |
| B/Yamagata          | 130    | 124 | 95.4 (90.2-98.3) | 113      | 52 | 46.0 (36.6-55.6) |

CI: confidence interval; HI: hemagglutination inhibition; SCR: seroconversion rate
