# Supplementary material for: Anamnestic Immune Response and Safety of an Inactivated Quadrivalent Influenza Vaccine in Primed Versus Vaccine-Naïve Children
Source: PubMed Central journal article supplement — Pediatr Infect Dis J. 2018 Oct 15;38(2):203–10. doi: 10.1097/INF.0000000000002217 (PMC6344072; doi:10.1097/inf.0000000000002217), 2018-10-15
Supplement: inf-38-203-s008.pdf [file inf-38-203-s008.pdf]

## Supplemental Digital Content 8

Seroprotection rate for HI antibodies 7 days after first vaccination in the revaccination study, overall and by age strata (per-protocol cohort)

|                     | Primed |     |                  | Unprimed |    |                  |
|---------------------|--------|-----|------------------|----------|----|------------------|
|                     | N      | n   | SPR, % (95% CI)  | N        | n  | SPR, % (95% CI)  |
| <b>All ages</b>     |        |     |                  |          |    |                  |
| A/H1N1              | 224    | 217 | 96.9 (93.7-98.7) | 209      | 72 | 34.4 (28.0-41.3) |
| A/H3N2              | 224    | 193 | 86.2 (80.9-90.4) | 209      | 81 | 38.8 (32.1-45.7) |
| B/Victoria          | 224    | 217 | 96.9 (93.7-98.7) | 209      | 84 | 40.2 (33.5-47.2) |
| B/Yamagata          | 224    | 216 | 96.4 (93.1-98.4) | 209      | 83 | 39.7 (33.0-46.7) |
| <b>17-29 months</b> |        |     |                  |          |    |                  |
| A/H1N1              | 91     | 86  | 94.5 (87.6-98.2) | 92       | 20 | 21.7 (13.8-31.6) |
| A/H3N2              | 91     | 75  | 82.4 (73.0-89.6) | 92       | 27 | 29.3 (20.3-39.8) |
| B/Victoria          | 91     | 85  | 93.4 (86.2-97.5) | 92       | 30 | 32.6 (23.2-43.2) |
| B/Yamagata          | 91     | 85  | 93.4 (86.2-97.5) | 92       | 26 | 28.3 (19.4-38.6) |
| <b>30-48 months</b> |        |     |                  |          |    |                  |
| A/H1N1              | 133    | 131 | 98.5 (94.7-99.8) | 117      | 52 | 44.4 (35.3-53.9) |
| A/H3N2              | 133    | 118 | 88.7 (82.1-93.5) | 117      | 54 | 46.2 (36.9-55.6) |
| B/Victoria          | 133    | 132 | 99.2 (95.9-100)  | 117      | 54 | 46.2 (36.9-55.6) |
| B/Yamagata          | 133    | 131 | 98.5 (94.7-99.8) | 117      | 57 | 48.7 (39.4-58.1) |

CI: confidence interval; HI: hemagglutination inhibition; SPR: seroprotection rate
