# Supplementary material for: Anamnestic Immune Response and Safety of an Inactivated Quadrivalent Influenza Vaccine in Primed Versus Vaccine-Naïve Children
Source: PubMed Central journal article supplement — Pediatr Infect Dis J. 2018 Oct 15;38(2):203–10. doi: 10.1097/INF.0000000000002217 (PMC6344072; doi:10.1097/inf.0000000000002217), 2018-10-15
Supplement: inf-38-203-s009.pdf [file inf-38-203-s009.pdf]

## Supplemental Digital Content 9

Mean geometric increase for HI, neutralizing and anti-neuraminidase antibodies 7 days after first vaccination in the revaccination study, overall and by age strata (per-protocol cohort)

|                                | Primed |                  | Unprimed |               |
|--------------------------------|--------|------------------|----------|---------------|
|                                | N      | MGI (95% CI)     | N        | MGI (95% CI)  |
| <b>HI antibodies</b>           |        |                  |          |               |
| <b>All ages</b>                |        |                  |          |               |
| A/H1N1                         | 221    | 10.3 (8.5-12.4)  | 202      | 3.2 (2.6-3.9) |
| A/H3N2                         | 221    | 10.9 (9.4-12.6)  | 202      | 2.9 (2.4-3.6) |
| B/Victoria                     | 221    | 6.7 (5.9-7.6)    | 202      | 4.6 (3.8-5.5) |
| B/Yamagata                     | 221    | 15.2 (13.3-17.3) | 202      | 4.0 (3.3-4.9) |
| <b>17-29 months</b>            |        |                  |          |               |
| A/H1N1                         | 91     | 13.6 (10.3-18.0) | 89       | 2.4 (1.8-3.2) |
| A/H3N2                         | 91     | 9.9 (7.7-12.7)   | 89       | 2.2 (1.6-3.0) |
| B/Victoria                     | 91     | 7.0 (5.7-8.6)    | 89       | 3.3 (2.5-4.4) |
| B/Yamagata                     | 91     | 15.1 (11.9-19.0) | 89       | 2.9 (2.2-3.7) |
| <b>30-48 months</b>            |        |                  |          |               |
| A/H1N1                         | 130    | 8.4 (6.5-10.9)   | 113      | 4.0 (3.1-5.3) |
| A/H3N2                         | 130    | 11.6 (9.7-13.8)  | 113      | 3.7 (2.8-4.9) |
| B/Victoria                     | 130    | 6.5 (5.5-7.7)    | 113      | 6.0 (4.8-7.5) |
| B/Yamagata                     | 130    | 15.2 (13.1-17.7) | 113      | 5.2 (4.0-6.9) |
| <b>Neutralizing antibodies</b> |        |                  |          |               |
| <b>All ages</b>                |        |                  |          |               |
| A/H1N1                         | 97     | 10.6 (8.2-13.7)  | 89       | 3.1 (2.3-4.2) |
| A/H3N2                         | 97     | 6.4 (5.4-7.6)    | 94       | 4.5 (3.2-6.2) |
| B/Victoria                     | 107    | 5.0 (4.3-5.8)    | 108      | 2.1 (1.6-2.8) |
| B/Yamagata                     | 107    | 5.0 (4.3-5.7)    | 105      | 1.7 (1.4-2.0) |
| <b>17-29 months</b>            |        |                  |          |               |
| A/H1N1                         | 47     | 13.1 (9.2-18.8)  | 44       | 2.0 (1.4-3.0) |
| A/H3N2                         | 48     | 6.1 (4.8-7.7)    | 46       | 3.4 (2.1-5.4) |
| B/Victoria                     | 53     | 5.4 (4.4-6.5)    | 53       | 1.8 (1.2-2.6) |
| B/Yamagata                     | 53     | 4.4 (3.8-5.2)    | 51       | 1.5 (1.2-2.0) |
| <b>30-48 months</b>            |        |                  |          |               |
| A/H1N1                         | 50     | 8.7 (6.0-12.5)   | 45       | 4.7 (3.0-7.3) |
| A/H3N2                         | 49     | 6.7 (5.1-8.8)    | 48       | 5.9 (3.8-9.2) |

|                                      |     |                 |     |               |
|--------------------------------------|-----|-----------------|-----|---------------|
| B/Victoria                           | 54  | 4.7 (3.8-5.8)   | 55  | 2.5 (1.6-3.8) |
| B/Yamagata                           | 54  | 5.5 (4.5-6.9)   | 54  | 1.8 (1.4-2.4) |
| <b>Anti-neuraminidase antibodies</b> |     |                 |     |               |
| <b>All ages</b>                      |     |                 |     |               |
| A/H1N1                               | 105 | 8.3 (6.5-10.7)  | 106 | 1.8 (1.5-2.1) |
| A/H3N2                               | 107 | 4.9 (4.2-5.8)   | 106 | 2.0 (1.7-2.3) |
| B/Victoria                           | 105 | 5.2 (4.4-6.0)   | 106 | 1.9 (1.5-2.4) |
| B/Yamagata                           | 105 | 8.8 (7.5-10.2)  | 106 | 2.7 (2.1-3.4) |
| <b>17-29 months</b>                  |     |                 |     |               |
| A/H1N1                               | 53  | 11.4 (8.2-15.8) | 52  | 1.5 (1.2-1.9) |
| A/H3N2                               | 53  | 4.6 (3.6-5.8)   | 52  | 1.7 (1.4-2.0) |
| B/Victoria                           | 53  | 5.2 (4.3-6.3)   | 52  | 1.5 (1.1-2.1) |
| B/Yamagata                           | 53  | 8.8 (7.2-10.8)  | 52  | 2.2 (1.5-3.2) |
| <b>30-48 months</b>                  |     |                 |     |               |
| A/H1N1                               | 52  | 6.0 (4.1-8.8)   | 54  | 2.1 (1.7-2.7) |
| A/H3N2                               | 54  | 5.3 (4.2-6.8)   | 54  | 2.3 (1.9-2.8) |
| B/Victoria                           | 52  | 5.1 (4.1-6.5)   | 54  | 2.3 (1.6-3.4) |
| B/Yamagata                           | 52  | 8.7 (6.9-11.0)  | 54  | 3.2 (2.3-4.5) |

CI: confidence interval; HI: hemagglutination inhibition; MGI: mean geometric increase
