# Supplementary material for: Anamnestic Immune Response and Safety of an Inactivated Quadrivalent Influenza Vaccine in Primed Versus Vaccine-Naïve Children
Source: PubMed Central journal article supplement — Pediatr Infect Dis J. 2018 Oct 15;38(2):203–10. doi: 10.1097/INF.0000000000002217 (PMC6344072; doi:10.1097/inf.0000000000002217), 2018-10-15
Supplement: inf-38-203-s010.pdf [file inf-38-203-s010.pdf]

## Supplemental Digital Content 10

**GMT pre-vaccination and 7 days after first vaccination, GMT ratio, SCR difference and SPR difference for HI antibodies in the revaccination study (per-protocol cohort excluding children with an RT-PCR-confirmed influenza infection in the primary study)**

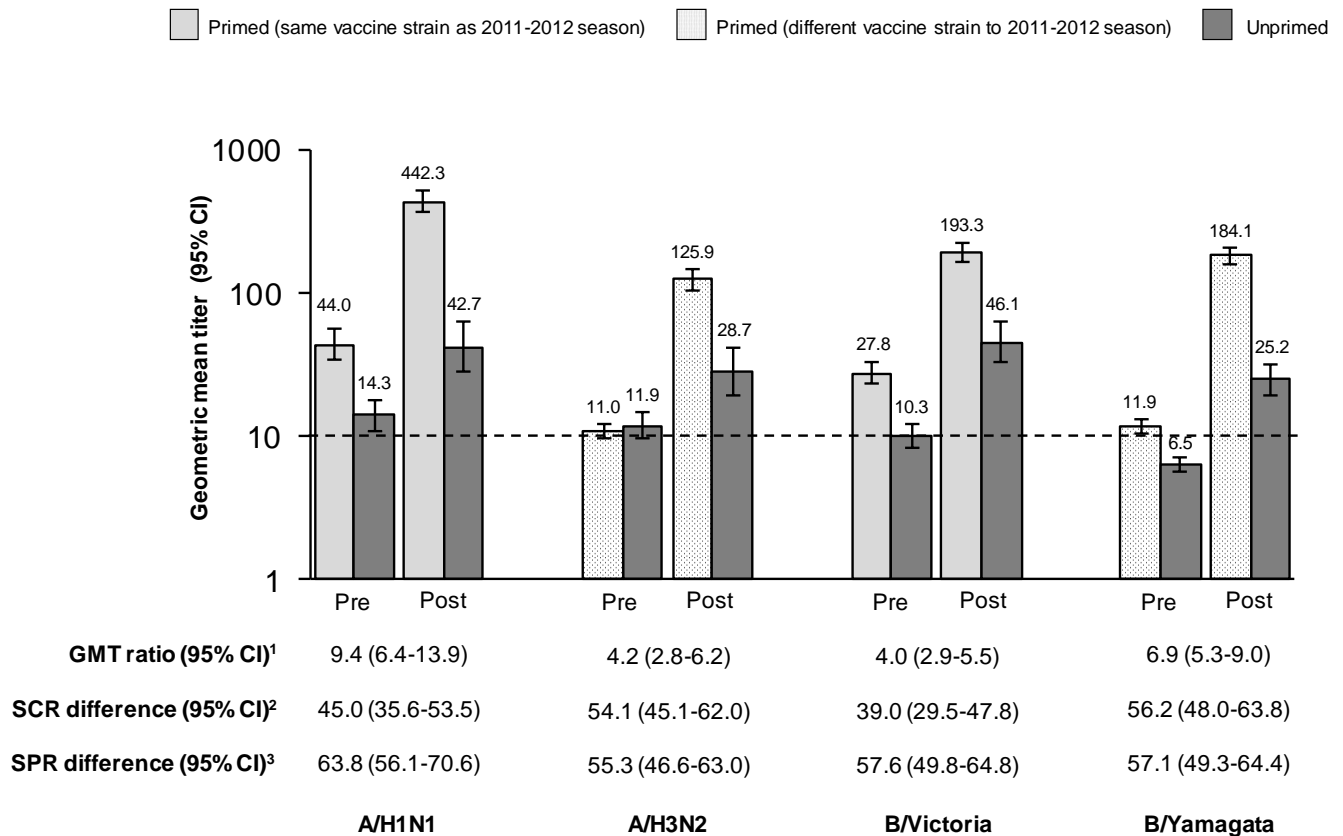

<sup>1</sup>GMT ratio adjusted for age (primed/unprimed); <sup>2</sup>Difference in SCR (primed minus unprimed); <sup>3</sup>Difference in SPR (primed minus unprimed)

Dotted line represents the assay cut-off (10 1/dil). GMT values are shown above the bars.

CI: confidence interval; GMT: geometric mean titer; HI: hemagglutination inhibition; Pre: pre-vaccination; Post: 7 days following vaccination; RT-PCR: reverse transcription polymerase chain reaction; SCR: seroconversion rate; SPR: seroprotection rate
