# Supplementary material for: Anamnestic Immune Response and Safety of an Inactivated Quadrivalent Influenza Vaccine in Primed Versus Vaccine-Naïve Children
Source: PubMed Central journal article supplement — Pediatr Infect Dis J. 2018 Oct 15;38(2):203–10. doi: 10.1097/INF.0000000000002217 (PMC6344072; doi:10.1097/inf.0000000000002217), 2018-10-15
Supplement: inf-38-203-s011.pdf [file inf-38-203-s011.pdf]

## Supplemental Digital Content 11

**Seroprotection rate and seroconversion rate for HI antibodies 7 days after first vaccination in the revaccination study (per-protocol cohort excluding children with an RT-PCR-confirmed influenza infection in the primary study)**

|            | Primed |     |                  | Unprimed |    |                  |
|------------|--------|-----|------------------|----------|----|------------------|
|            | N      | n   | Rate, % (95% CI) | N        | n  | Rate, % (95% CI) |
| <b>SPR</b> |        |     |                  |          |    |                  |
| A/H1N1     | 213    | 206 | 96.7 (93.3-98.7) | 179      | 59 | 33.0 (26.1-40.4) |
| A/H3N2     | 213    | 182 | 85.4 (80.0-89.9) | 179      | 54 | 30.2 (23.5-37.5) |
| B/Victoria | 213    | 206 | 96.7 (93.3-98.7) | 179      | 70 | 39.1 (31.9-46.7) |
| B/Yamagata | 213    | 205 | 96.2 (92.7-98.4) | 179      | 70 | 39.1 (31.9-46.7) |
| <b>SCR</b> |        |     |                  |          |    |                  |
| A/H1N1     | 210    | 160 | 76.2 (69.8-81.8) | 173      | 54 | 31.2 (24.4-38.7) |
| A/H3N2     | 210    | 173 | 82.4 (76.5-87.3) | 173      | 49 | 28.3 (21.7-35.7) |
| B/Victoria | 210    | 162 | 77.1 (70.9-82.6) | 173      | 66 | 38.2 (30.9-45.8) |
| B/Yamagata | 210    | 197 | 93.8 (89.6-96.7) | 173      | 65 | 37.6 (30.3-45.2) |

CI: confidence interval; HI: hemagglutination inhibition; RT-PCR: reverse transcription polymerase chain reaction; SCR: seroconversion rate; SPR: seroprotection rate
