# Supplementary material for: Anamnestic Immune Response and Safety of an Inactivated Quadrivalent Influenza Vaccine in Primed Versus Vaccine-Naïve Children
Source: PubMed Central journal article supplement — Pediatr Infect Dis J. 2018 Oct 15;38(2):203–10. doi: 10.1097/INF.0000000000002217 (PMC6344072; doi:10.1097/inf.0000000000002217), 2018-10-15
Supplement: inf-38-203-s013.pdf [file inf-38-203-s013.pdf]

## Supplemental Digital Content 13

**GMT pre-vaccination and 7 days after first vaccination and MGI for anti-neuraminidase antibodies in the revaccination study (per-protocol cohort excluding children with an RT-PCR-confirmed influenza infection in the primary study)**

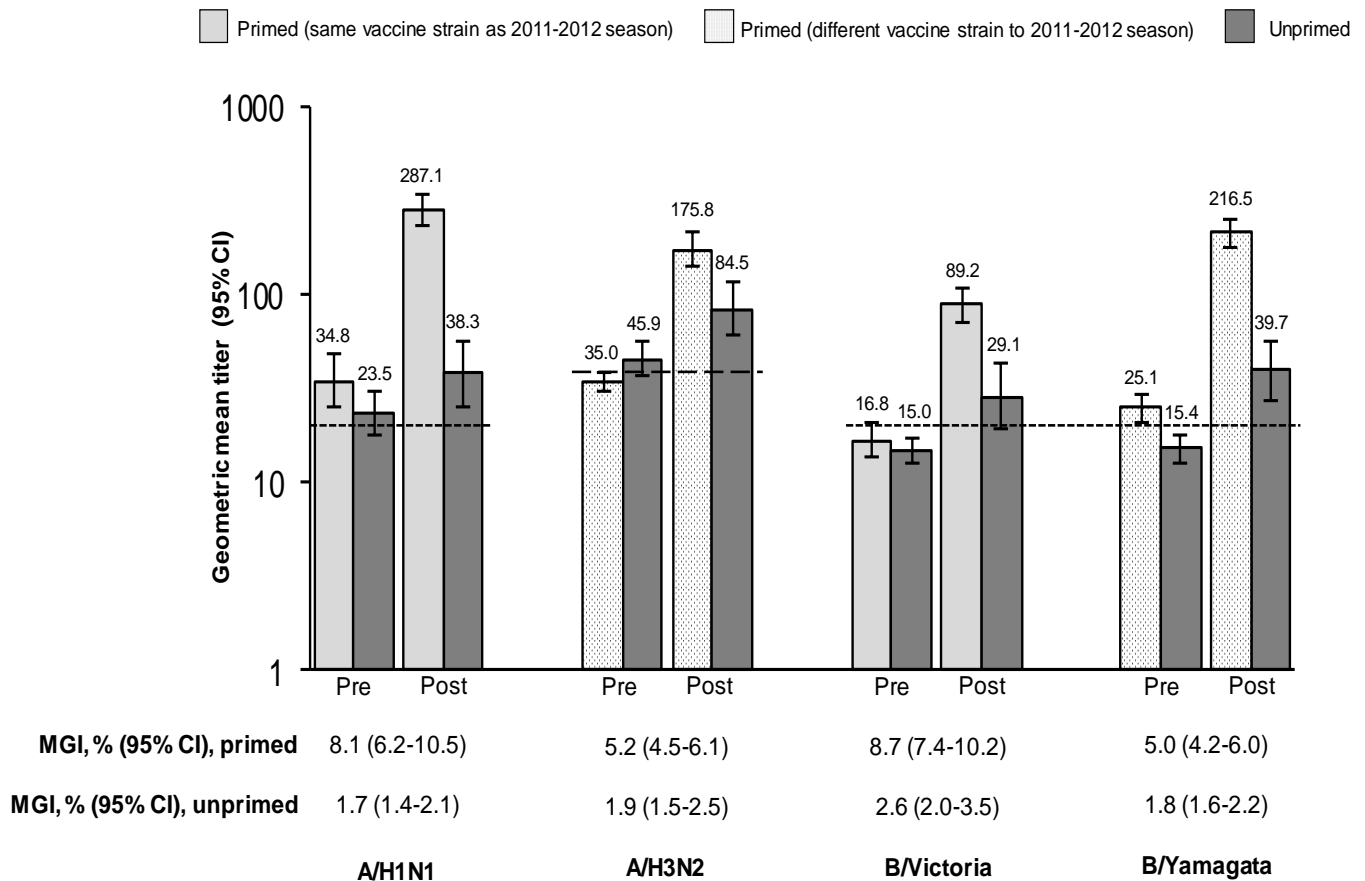

Dotted line represents the assay cut-off for the A/H1N1, B/Victoria and B/Yamagata strains (20 1/dil) and A/H3N2 strain (40 1/dil). GMT values are shown above the bars.

CI: confidence interval; GMT: geometric mean titer; MGI: mean geometric increase; Pre: pre-vaccination; Post: 7 days following vaccination; RT-PCR: reverse transcription polymerase chain reaction
